# Supplementary material for: Metabolic cross-feeding structures the assembly of polysaccharide degrading communities
Source: PubMed Central journal article supplement — Sci Adv. 2022 Feb 23;8(8):eabk3076. doi: 10.1126/sciadv.abk3076 (PMC8865766; doi:10.1126/sciadv.abk3076), 2022-02-23
Supplement: sciadv.abk3076_sm.pdf [file sciadv.abk3076_sm.pdf]

Supplementary Materials for  
**Metabolic cross-feeding structures the assembly of polysaccharide  
degrading communities**

Sammy Pontrelli, Rachel Szabo, Shaul Pollak, Julia Schwartzman, Daniela Ledezma-Tejeida,  
Otto X. Cordero, Uwe Sauer\*

\*Corresponding author. Email: sauer@imsb.biol.ethz.ch

Published 23 February 2022, *Sci. Adv.* **8**, eabk3076 (2022)  
DOI: 10.1126/sciadv.abk3076

**The PDF file includes:**

Legends for datasets S1 to S6  
Figs. S1 to S6  
Tables S1 to S5

**Other Supplementary Material for this manuscript includes the following:**

Datasets S1 to S6

## **Supplementary datasets**

Supplementary Dataset 1: LC-MS measurements of metabolites produced by degraders and exploiters after growth on chitin or GlcNAc

Supplementary Dataset 2: FIA-QTOF-MS measurements of metabolites produced by degraders and exploiters after growth on GlcNAc or chitin, measurements of metabolites produced by exploiters after growth on enzyme digest of degraders, and measurements of metabolites produced and consumed by all strains after growth on pooled supernatant

Supplementary Dataset 3: Compiled metabolite production and consumption data of each species that participated in 6 member chitin cocultures. This data was used for coculture specific metabolic network construction. The production and consumption data is compiled from individual metabolite production and consumption data of degraders grown on chitin, GlcNAc oligomers that degraders form extracellularly, secretion profiles of exploiters after growth in pooled supernatant, and metabolites consumed by exploiters and scavengers in pooled supernatant.

Supplementary Dataset 4: Hypothetical degrader-derived and exploiter-derived metabolite pools used for construction of hypothetical metabolic exchange networks and Boolean logic modelling to explain the outcome of six member chitin degrading cocultures.

Supplementary Dataset 5: 12 Hypothetical metabolic exchanged networks that were constructed based on the outcome of six member chitin degrading cocultures.

Supplementary Dataset 6: Proteins related to chitin degradation and metabolism found to be present in the species used in this work.

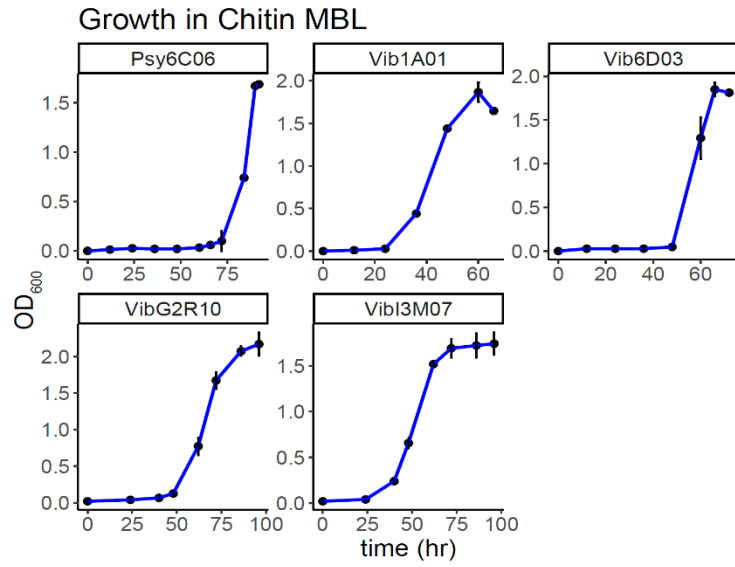

**Fig S1:** Growth of degraders on Chitin MBL containing 2g/l colloidal chitin. Error bars represent standard deviation of three biological replicates

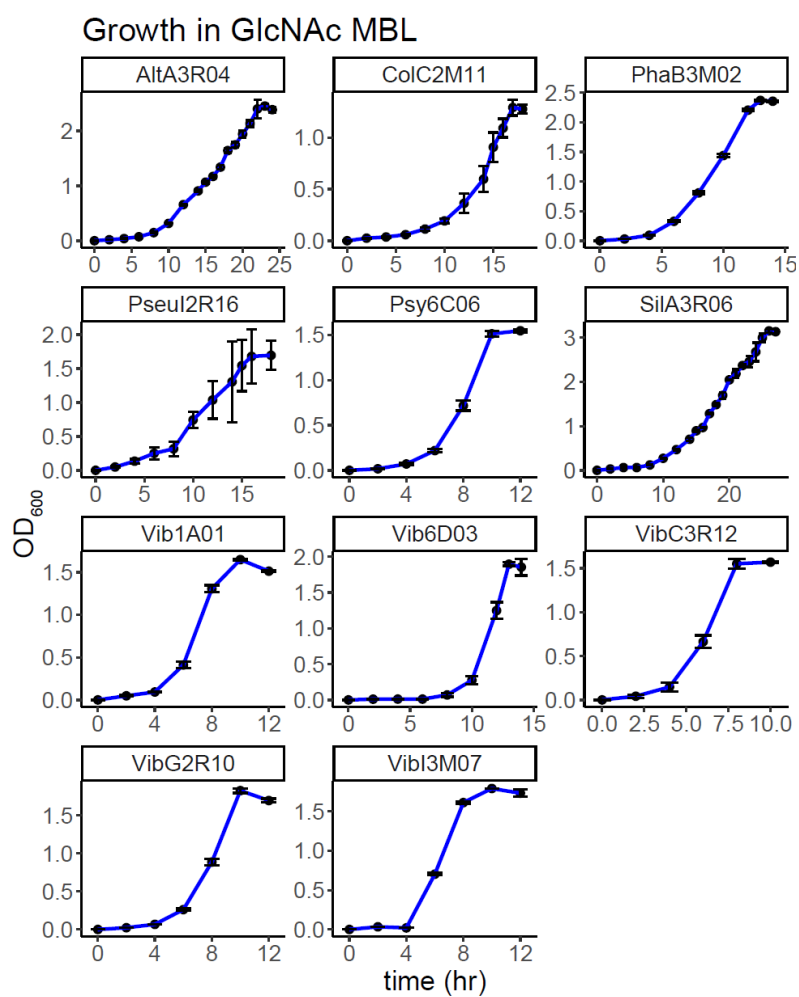

**Fig S2:** Growth of degraders and exploiters on GlcNAc MBL containing 20mM GlcNAc. Error bars represent standard deviation of three biological replicates

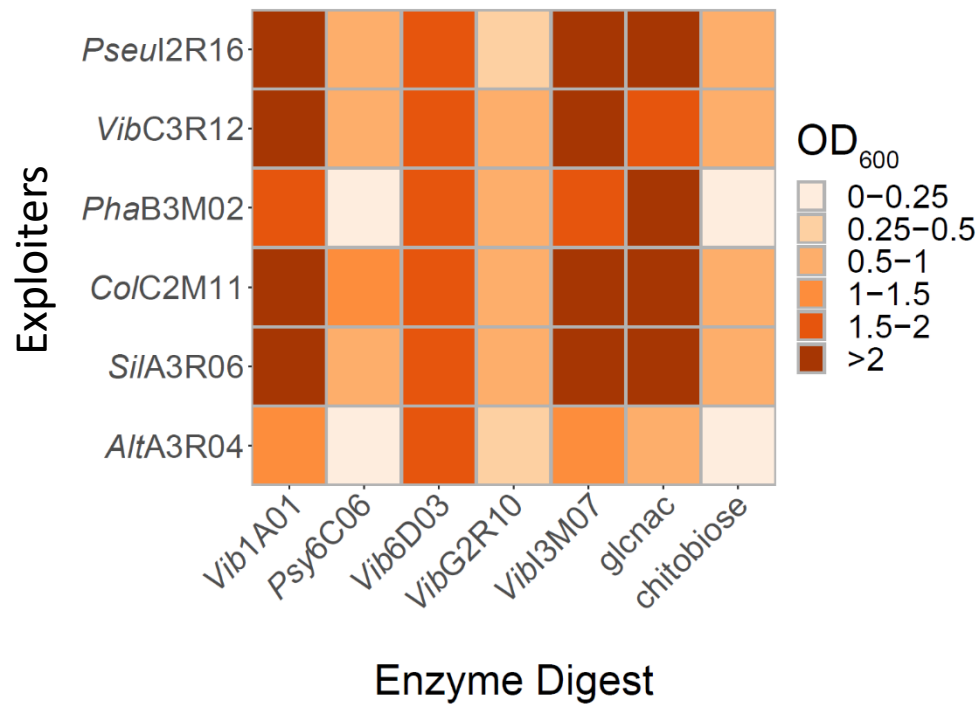

**Fig S3:** Growth of exploiters (vertical axis) after 36 h on colloidal chitin that was digested by enzymes concentrated from supernatants of the five degraders, 20mM GlcNAc or 10mM chitobiose (horizontal axis).  $OD_{600}$  data is normalized by the amount of enzyme collected from each degrader as this affects the amount of oligomer liberated from undigested chitin. These values are (left to right) 97.1, 251, 140, 39.3, and 93.6  $\mu\text{g/ml}$ .

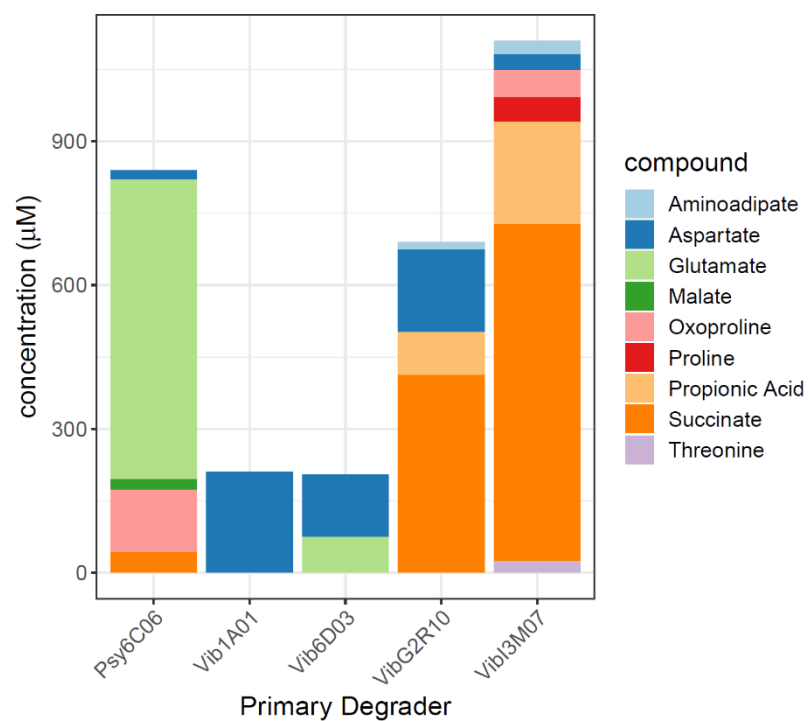

**Fig S4:** LC-MS measurements of metabolites secreted by degraders after growth on Chitin. Measurements represent the average of three independent biological replicates.

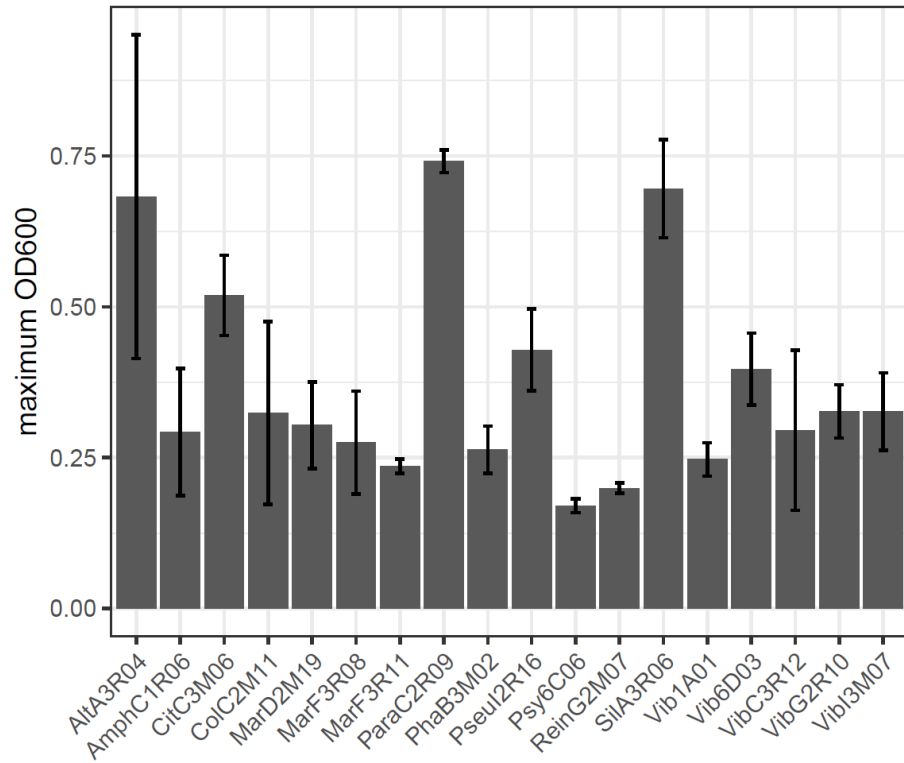

**Fig S5:** OD<sub>600</sub> of each species after growth on pooled supernatant at 24 hours. Error bars represent standard deviation of three biological replicates.

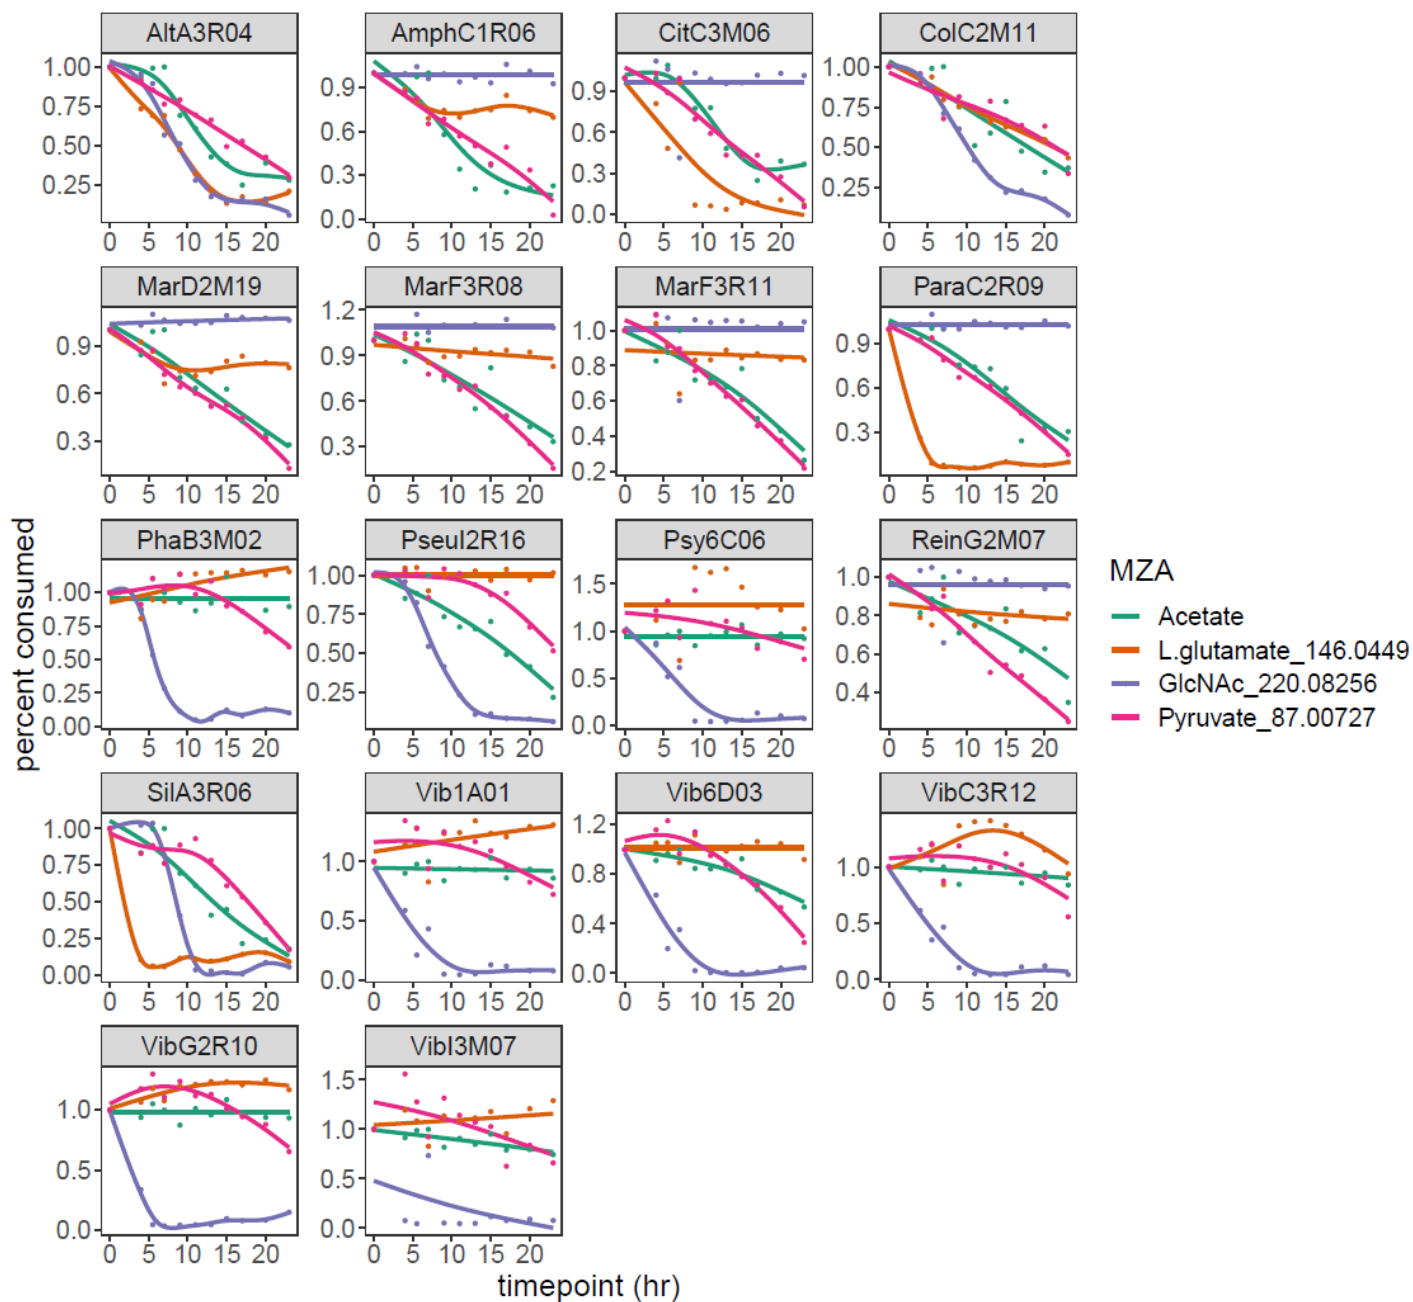

**Fig S6:** FIA-QTOF-MS timecourse measurements of consumption of four metabolites by each species when grown in pooled supernatant. Curves are fit using local polynomial regression.



| Species   | Taxonomic ID              | Functional Guild | NCBI BioProject | NCBI BioSample |
|-----------|---------------------------|------------------|-----------------|----------------|
| AltA3R04  | Alteromonas sp.           | Exploiter        | PRJNA478695     | SAMN19350919   |
| AmphC1R06 | Amphritea sp.             | Scavenger        | PRJNA478695     | SAMN19350932   |
| CitC3M06  | Citricella sp.            | Scavenger        | PRJNA478695     | SAMN19350936   |
| ColC2M11  | Colwellia psychrerythraea | Exploiter        | PRJNA478695     | SAMN19350933   |
| MarD2M19  | Marinobacter sp.          | Scavenger        | PRJNA478695     | SAMN19350941   |
| MarF3R08  | Marinobacter sp.          | Scavenger        | PRJNA478695     | SAMN19350954   |
| MarF3R11  | Marinobacter sp.          | Scavenger        | PRJNA478695     | SAMN09522136   |
| ParaC2R09 | Paracoccus kamogawaensis  | Scavenger        | PRJNA478695     | SAMN19350935   |
| PhaB3M02  | Phaeobacter sp.           | Exploiter        | PRJNA478695     | SAMN09522130   |
| PseuI2R16 | f__Pseudoalteromonadaceae | Exploiter        | PRJNA478695     | SAMN19350960   |
| Psy6C06   | Psychromonas sp.          | Degrader         | PRJNA414740     | SAMN08130274   |
| ReinG2M07 | Reinekea sp.              | Scavenger        | PRJNA478695     | SAMN19350955   |
| SiIA3R06  | Silicibacter sp.          | Exploiter        | PRJNA478695     | SAMN19350920   |
| Vib1A01   | Vibrio splendidus         | Degrader         | PRJNA414740     | SAMN07809270   |
| Vib6D03   | Vibrio penaeicida         | Degrader         | PRJNA414740     | SAMN08130373   |
| VibC3R12  | Vibrio sp.                | Exploiter        | PRJNA478695     | SAMN09522132   |
| VibG2R10  | Vibrio sp.                | Degrader         | PRJNA478695     | SAMN19350956   |
| VibI3M07  | Vibrio sp.                | Degrader         | PRJNA478695     | SAMN19350961   |

**Table S1:** Species used in this study and NCBI accession numbers for accessing genomic sequences.

|                | <i>SilA3R06</i> | <i>AltA3R04</i> | <i>VibC3R12</i> | <i>ColC2M11</i> |
|----------------|-----------------|-----------------|-----------------|-----------------|
| <i>Vib1A01</i> | 85%             | 23%             | 0%              | 0%              |
| <i>Psy6C06</i> | 83%             | 44%             | 0%              | 17%             |
| <i>Vib6D03</i> | 67%             | 33%             | 0%              | 33%             |

**Table S2:** Percentage of metabolites that are consumed by exploiters (top row) from the degrader-derived metabolite pools that otherwise have the capacity to be consumed by scavengers.

| Coculture |           | Number of metabolites |          |
|-----------|-----------|-----------------------|----------|
| Degrader  | Exploiter | Consumed              | Secreted |
| 1A01      | A3R04     | 6                     | 6        |
| 1A01      | A3R06     | 19                    | 0        |
| 1A01      | C3R12     | 2                     | 13       |
| 1A01      | C2M11     | 4                     | 10       |
| 6C06      | A3R04     | 11                    | 5        |
| 6C06      | A3R06     | 21                    | 0        |
| 6C06      | C3R12     | 1                     | 13       |
| 6C06      | C2M11     | 5                     | 10       |
| 6D03      | A3R04     | 2                     | 5        |
| 6D03      | A3R06     | 7                     | 0        |
| 6D03      | C3R12     | 0                     | 0        |
| 6D03      | C2M11     | 3                     | 10       |

**Table S3.** Number of metabolites consumed or secreted by exploiters in every exchange network.

| Species          | Metabolite                      | m/z       |
|------------------|---------------------------------|-----------|
| <i>AltA3R04</i>  | NA                              |           |
| <i>SiIA3R06</i>  | NA                              |           |
| <i>CoIC2M11</i>  | NA                              |           |
| <i>VibC3R12</i>  | Glutamate                       | 146.0449  |
| <i>ParaC2R09</i> | Isocitrate                      | 191.01952 |
|                  | Alanine                         | 88.03792  |
|                  | Pantothenate                    | 218.10352 |
|                  | citraconate                     | 129.0183  |
| <i>MarD2M19</i>  | Isocitrate                      | 191.01952 |
|                  | 2,3-dihydroxy-3-methylbutanoate | 133.04882 |
|                  | Malate                          | 133.01218 |
|                  | Ketovaline                      | 115.03877 |
|                  | Fumatate                        | 115.00186 |
|                  | Glycolate                       | 75.00696  |
|                  | Isobutanal                      | 71.04872  |
| <i>CitC3M06</i>  | Alanine                         | 88.03792  |
|                  | Pantothenate                    | 218.10352 |
|                  | Citraconate                     | 129.0183  |
| <i>MarF3R11</i>  | Isocitrate                      | 191.01952 |
|                  | Citraconate                     | 129.0183  |

**Table S4:** Potential causal metabolites identified with Boolean logic that contribute to the growth of exploiters or scavengers in cocultures.

| Primer target name | Primer sequence      |
|--------------------|----------------------|
| 1A01 F             | GCACAGACCGTCCAAGAGAA |
| 1A01 R             | ACGGTCGCAAGCATATCAGT |
| C1R06 F            | GCATTCGTCGTCAGCGTAAC |
| C1R06 R            | GCAGGTTTTGCGTCGTAAGG |
| G2M07 F            | GCGCTGCACTATAGCCTGTA |
| G2M07 R            | CACGGGCTTTGAGGTAGTGT |
| G2R10 F            | AGTGAAACCACCAATCGGCA |
| G2R10 R            | GCACTATTGCTGTTAGGCGC |
| F3R08 F            | AAGACTGCTACAGTGGCCAC |
| F3R08 R            | CAGCAACGCCAGAAAAGTCC |
| 6C06 F             | AGCACACCCTCGCTCTAAAC |
| 6C06 R             | TGAGAAAGTCCTGTTCCGCC |
| A3R04 F            | GCTTGCCACCTTTCCCAAAG |
| A3R04 R            | TCCGGGCACATTGACAATCA |
| A3R06 F            | GAGTTACCCCATGTTCCGCA |
| A3R06 R            | AATTGTCATTGCCCGATGCG |
| C2M11 F            | TGAAGCGACTTTTGCAGTGC |
| C2M11 R            | CTGCAAGGGAGTAATGCGGA |
| B3M02 F            | AAAGGCGCTCGTCTTTGGTA |
| B3M02 R            | AGATGGGAAAGGTCATGCGG |

**Table S5:** qPCR Primers used in this study
